# Supplementary material
Source: PubMed Central journal article supplement (PMC2762489)

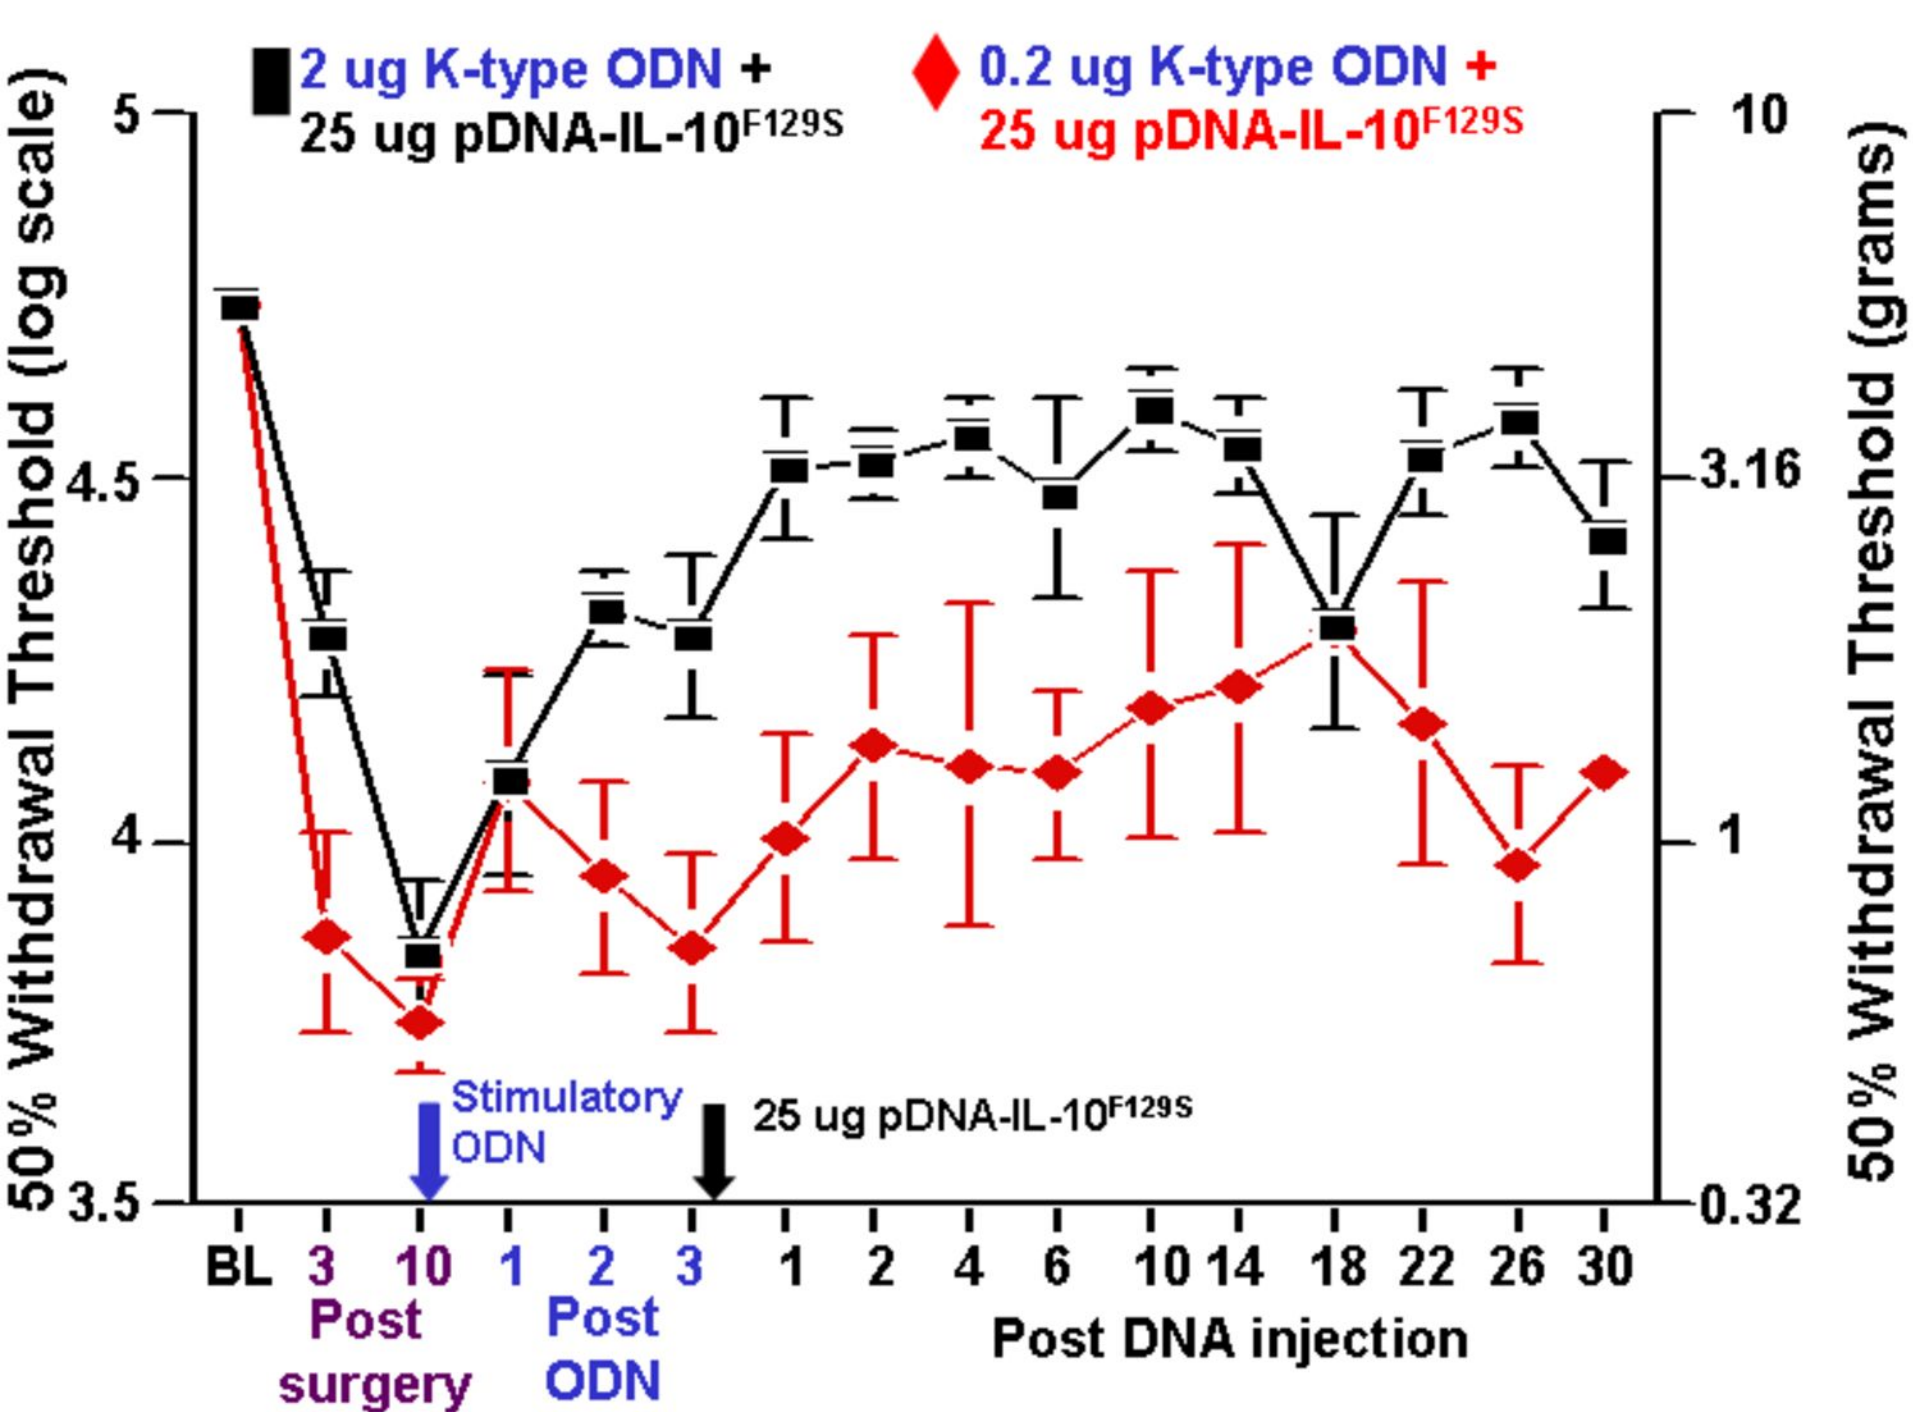

Supplement: NIHMS116770-supplement-supp_fig_1.pdf [file NIHMS116770-supplement-supp_fig_1.pdf]

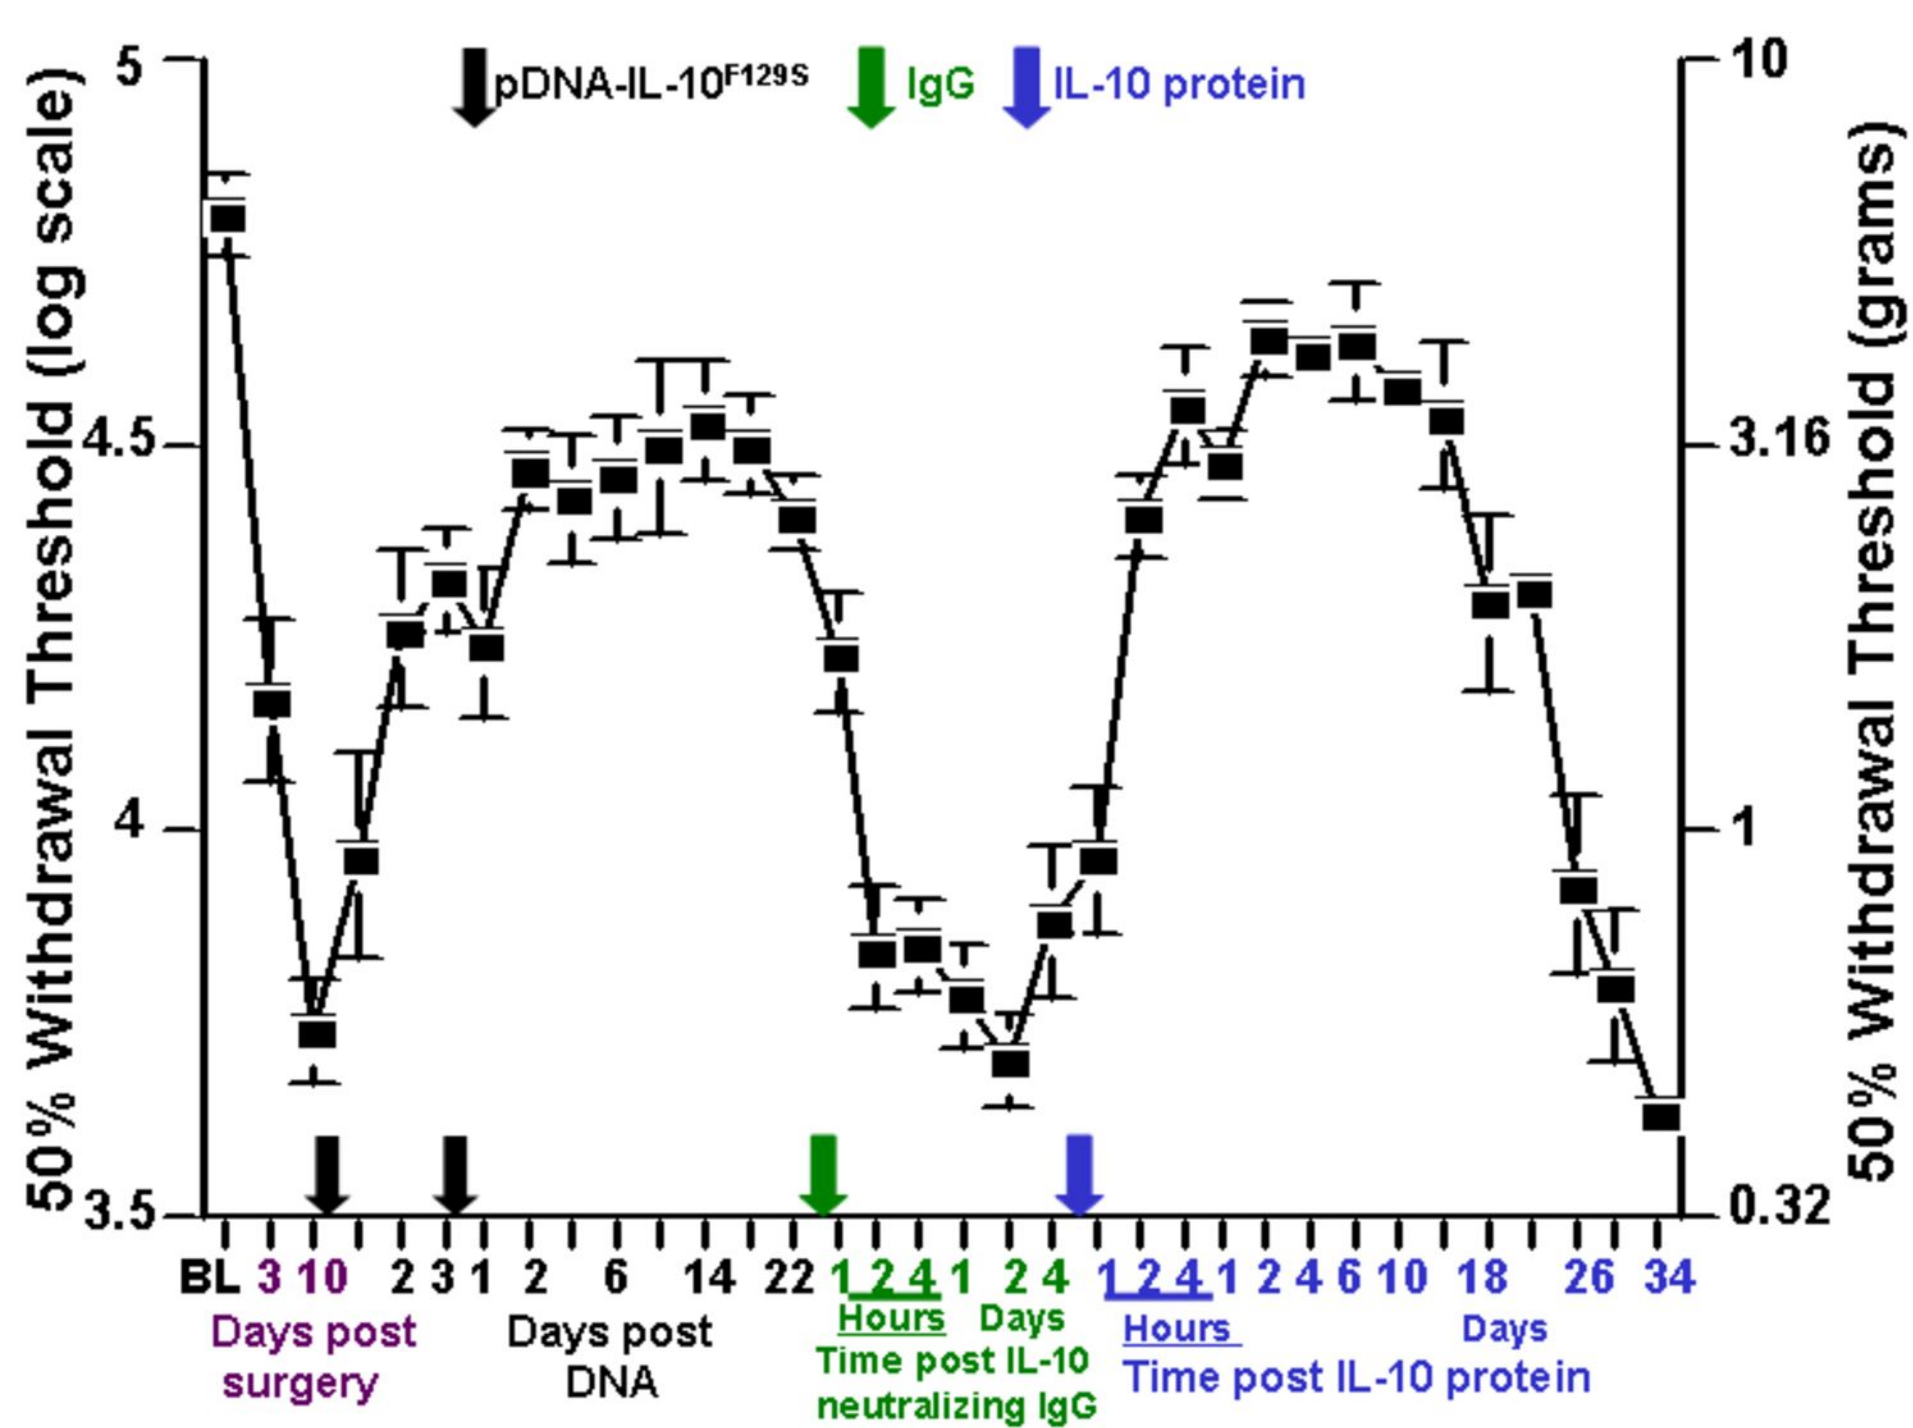

Supplement: NIHMS116770-supplement-supp_fig_2.pdf [file NIHMS116770-supplement-supp_fig_2.pdf]

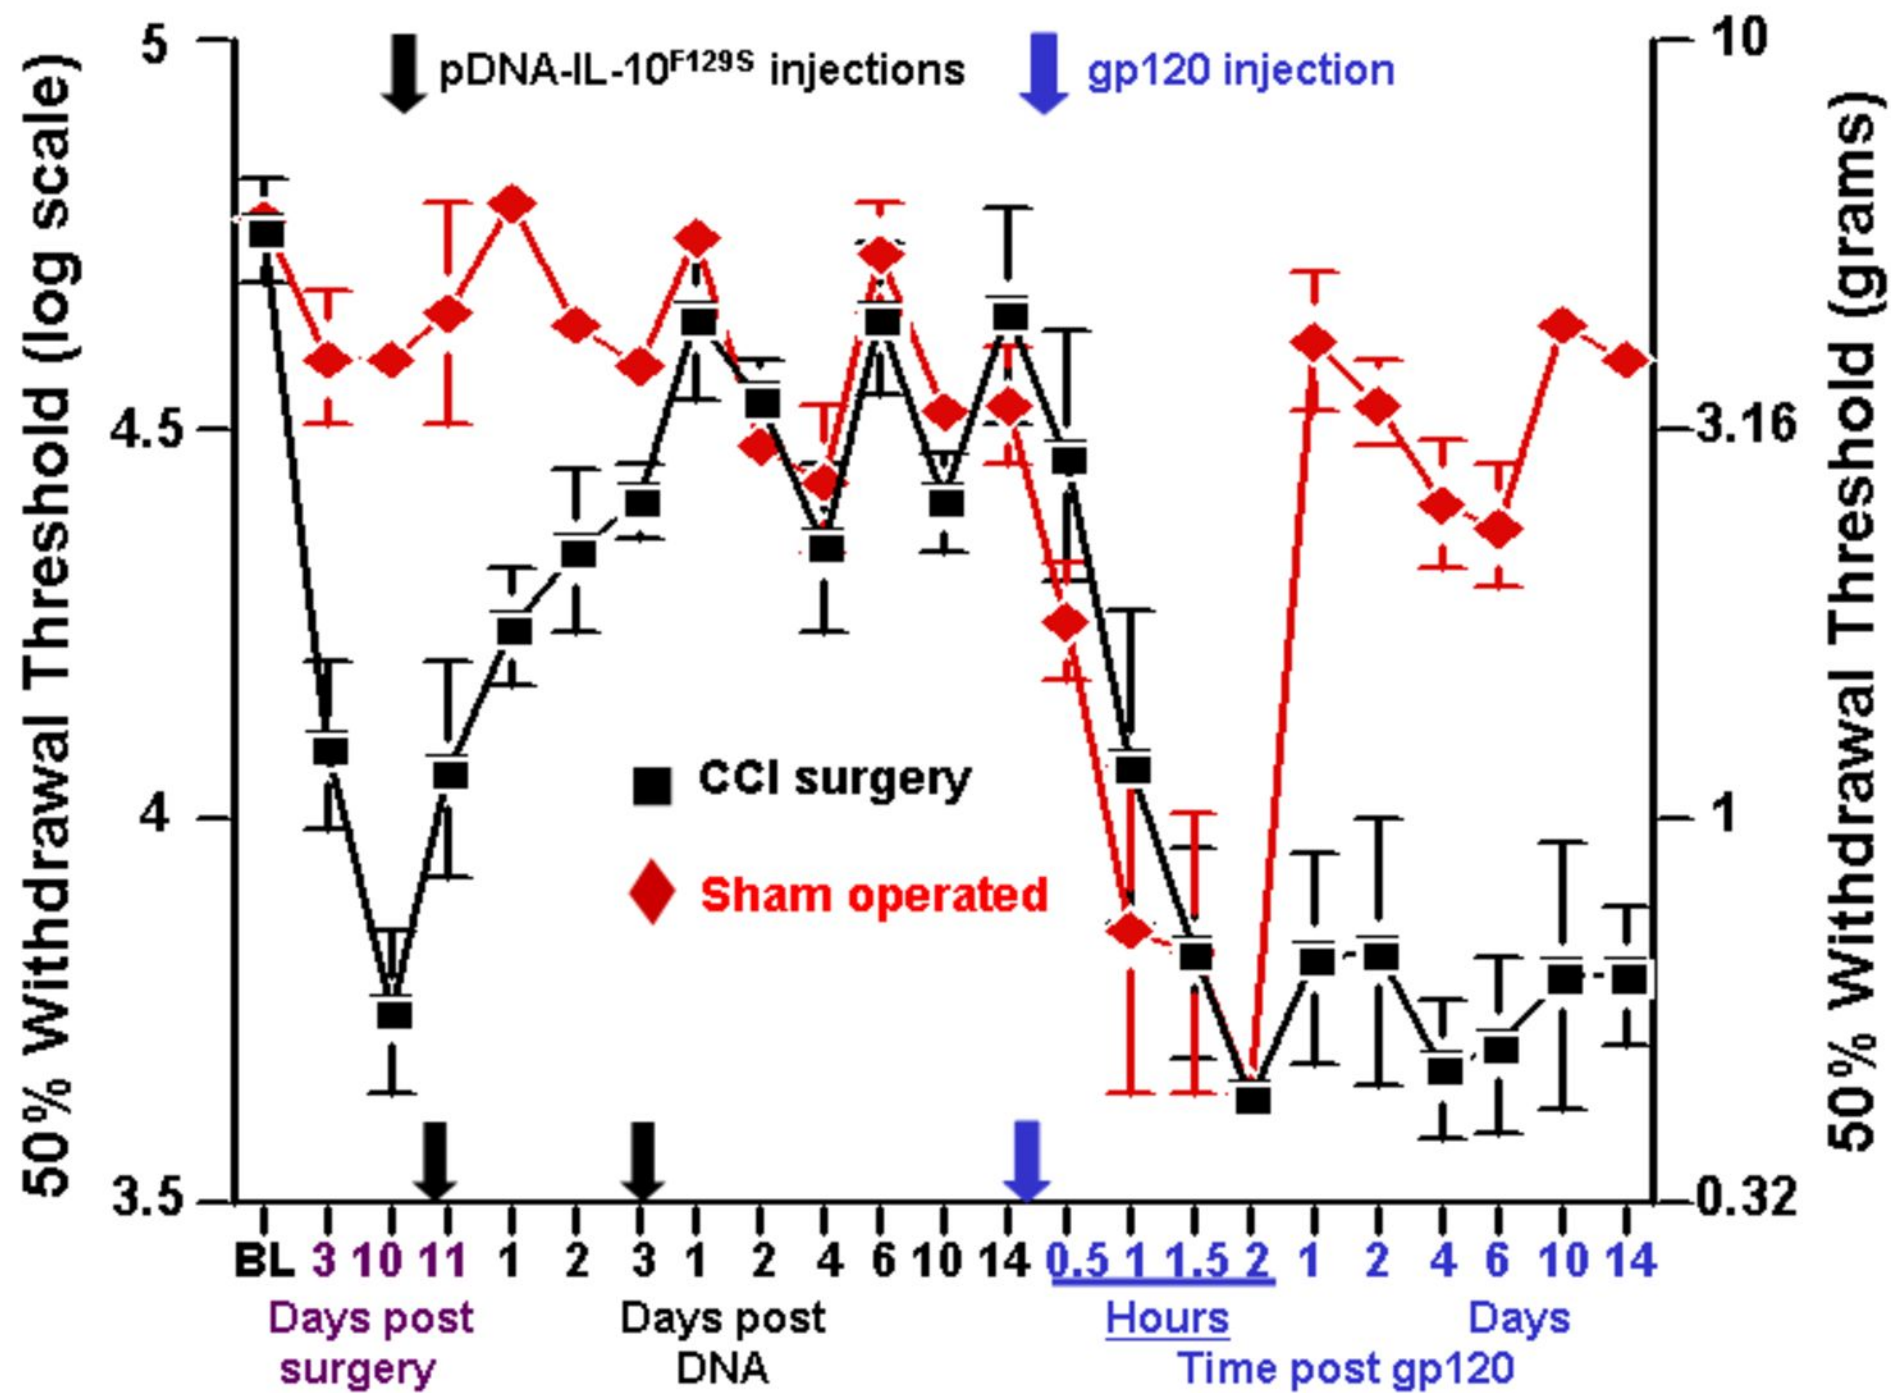

Supplement: NIHMS116770-supplement-supp_fig_3.pdf [file NIHMS116770-supplement-supp_fig_3.pdf]
